# Supplementary material for: A hierarchical procedure to select intrauterine and extrauterine factors for methodological validation of preterm birth risk estimation
Source: PubMed Central journal article supplement (PMC8052693; doi:10.1186/s12884-021-03654-3), 2021-04-16
Supplement: 12884_2021_3654_MOESM1_ESM.pdf [file 12884_2021_3654_MOESM1_ESM.pdf]

## RESEARCH

# A hierarchical procedure to select intrauterine and extrauterine factors for methodological validation of preterm birth risk estimation

Pasquale Anthony Della Rosa<sup>1†</sup>  
 , Cesare Miglioli<sup>2†</sup>  
 , Martina Caglioni<sup>3</sup>  
 , Francesca Tiberio<sup>3</sup>  
 , Kelsey H.H. Mosser<sup>1</sup>  
 , Edoardo Vignotto<sup>2</sup>  
 , Matteo Canini<sup>1</sup>  
 , Cristina Baldoli<sup>1</sup>  
 , Andrea Falini<sup>1</sup>  
 , Massimo Candiani<sup>3</sup>  
 and Paolo Cavoretto<sup>3\*</sup>

\*Correspondence:

cavoretto.paolo@hsr.it

<sup>3</sup>Obstetrics and Gynaecology  
 Department, IRCCS San Raffaele  
 Hospital and University, via  
 Olgettina 62, 20132 Milan, Italy  
 Full list of author information is  
 available at the end of the article

†Equal contributor

## Supplementary Material

In this file we present the additional tables that complete the findings presented in the article and answer to specific comments of the reviewers.

### Tables

**Table 1 Detailed overview of the extrauterine (EU) factors selected by Akaike Information Criterion [1] in the explanatory phase. We show the proportion of women in each preterm birth risk category depending on the presence of each factor, the estimated beta coefficient of a logistic regression with only the specific EU factor (i.e. univariate  $\hat{\beta}$ ) and the same beta coefficient of a logistic regression done with all the factors (i.e. multivariate  $\hat{\beta}$ ) specified in the EU model. We also provide the standard errors (SE) of the estimates in parenthesis.**

| EU Factor | Is present? | Low PTB Risk | High PTB Risk | Univariate $\hat{\beta}$ (SE) | Multivariate $\hat{\beta}$ (SE) |
|-----------|-------------|--------------|---------------|-------------------------------|---------------------------------|
| EU_AB     | No          | 47 (81%)     | 11 (19%)      | -                             | -                               |
|           | Yes         | 19 (45%)     | 23 (55%)      | 1.64 (0.46)                   | 1.07 (0.53)                     |
| EU_PE     | No          | 42(57%)      | 32 (43%)      | -                             | -                               |
|           | Yes         | 31 (84%)     | 6 (16%)       | -1.37 (0.50)                  | -1.45 (0.68)                    |
| EU_AX     | No          | 31 (82%)     | 7 (18%)       | -                             | -                               |
|           | Yes         | 41 (57%)     | 31 (43%)      | 1.21 (0.48)                   | 0.96 (0.56)                     |
| EU_AH     | No          | 63 (70%)     | 27 (30%)      | -                             | -                               |
|           | Yes         | 3 (30%)      | 7 (70%)       | 1.69 (0.73)                   | 2.85 (0.98)                     |

**Table 2** Matrix of centroids derived from fuzzy C-means clustering [2] on the risk factors selected by Akaike Information Criterion in the explanatory phase. We highlight in bold the risk factors that display at least one discordant sign among clusters (i.e. at least a + and a – on the same column). For continuous variables, the sign represents how much we need to add or subtract to the overall mean to obtain the centroid of a specific cluster. For example, if we consider IU\_CL, the typical (i.e. average) woman of Cluster 1 has a cervical length 0.356 cm higher than the overall mean. For dichotomous variables, a positive sign represents a prevalence of subjects that display that characteristic within a given cluster. For example, if we consider EU\_AB, the typical woman of Cluster 3 has taken antibiotics since we observe a positive sign. The same reasoning holds for the typical woman of Cluster 2 however, since the coefficient is smaller (i.e.  $0.438 > 0.021$ ), there is a smaller proportion of women that have taken antibiotics with respect to Cluster 3. The risk factors that display at least one discordant sign among clusters are informative.

| Cluster | IU_PP  | IU_PH  | IU_CL  | IU_FG  | IU_PC  | EU_AB  | EU_PE  | EU_AX  | EU_AH  |
|---------|--------|--------|--------|--------|--------|--------|--------|--------|--------|
| 1       | -0.018 | -0.006 | 0.356  | -0.019 | -0.007 | -0.223 | 0.309  | -0.207 | 0.013  |
| 2       | -0.009 | -0.008 | 0.231  | -0.008 | -0.015 | 0.021  | -0.177 | 0.156  | -0.025 |
| 3       | 0.018  | -0.022 | -1.638 | -0.070 | -0.037 | 0.438  | -0.259 | 0.137  | -0.061 |

#### Author details

<sup>1</sup>Neuroradiology Department, IRCCS San Raffaele Hospital and University, via Olgettina 62, 20132 Milan, Italy.

<sup>2</sup>Research Center for Statistics, University of Geneva, Boulevard du Pont-d'Arve 40, 1205 Geneva, Switzerland.

<sup>3</sup>Obstetrics and Gynaecology Department, IRCCS San Raffaele Hospital and University, via Olgettina 62, 20132 Milan, Italy.

#### References

1. Akaike H. Information theory and an extension of the maximum likelihood principle. In: Selected papers of hirotugu akaike. Springer; 1998. p. 199–213.
2. Bezdek JC, Ehrlich R, Full W. FCM: The fuzzy c-means clustering algorithm. *Computers & Geosciences*. 1984;10(2-3):191–203.
